# Supplementary material
Source: Springer Nature journal article supplement (https://www.springermedizin.de/resource/supplementary/12933_2012_495_MOESM1_ESM.pdf/9538638)

# Endothelial Function by Treatment

ANOVA P = 0.348

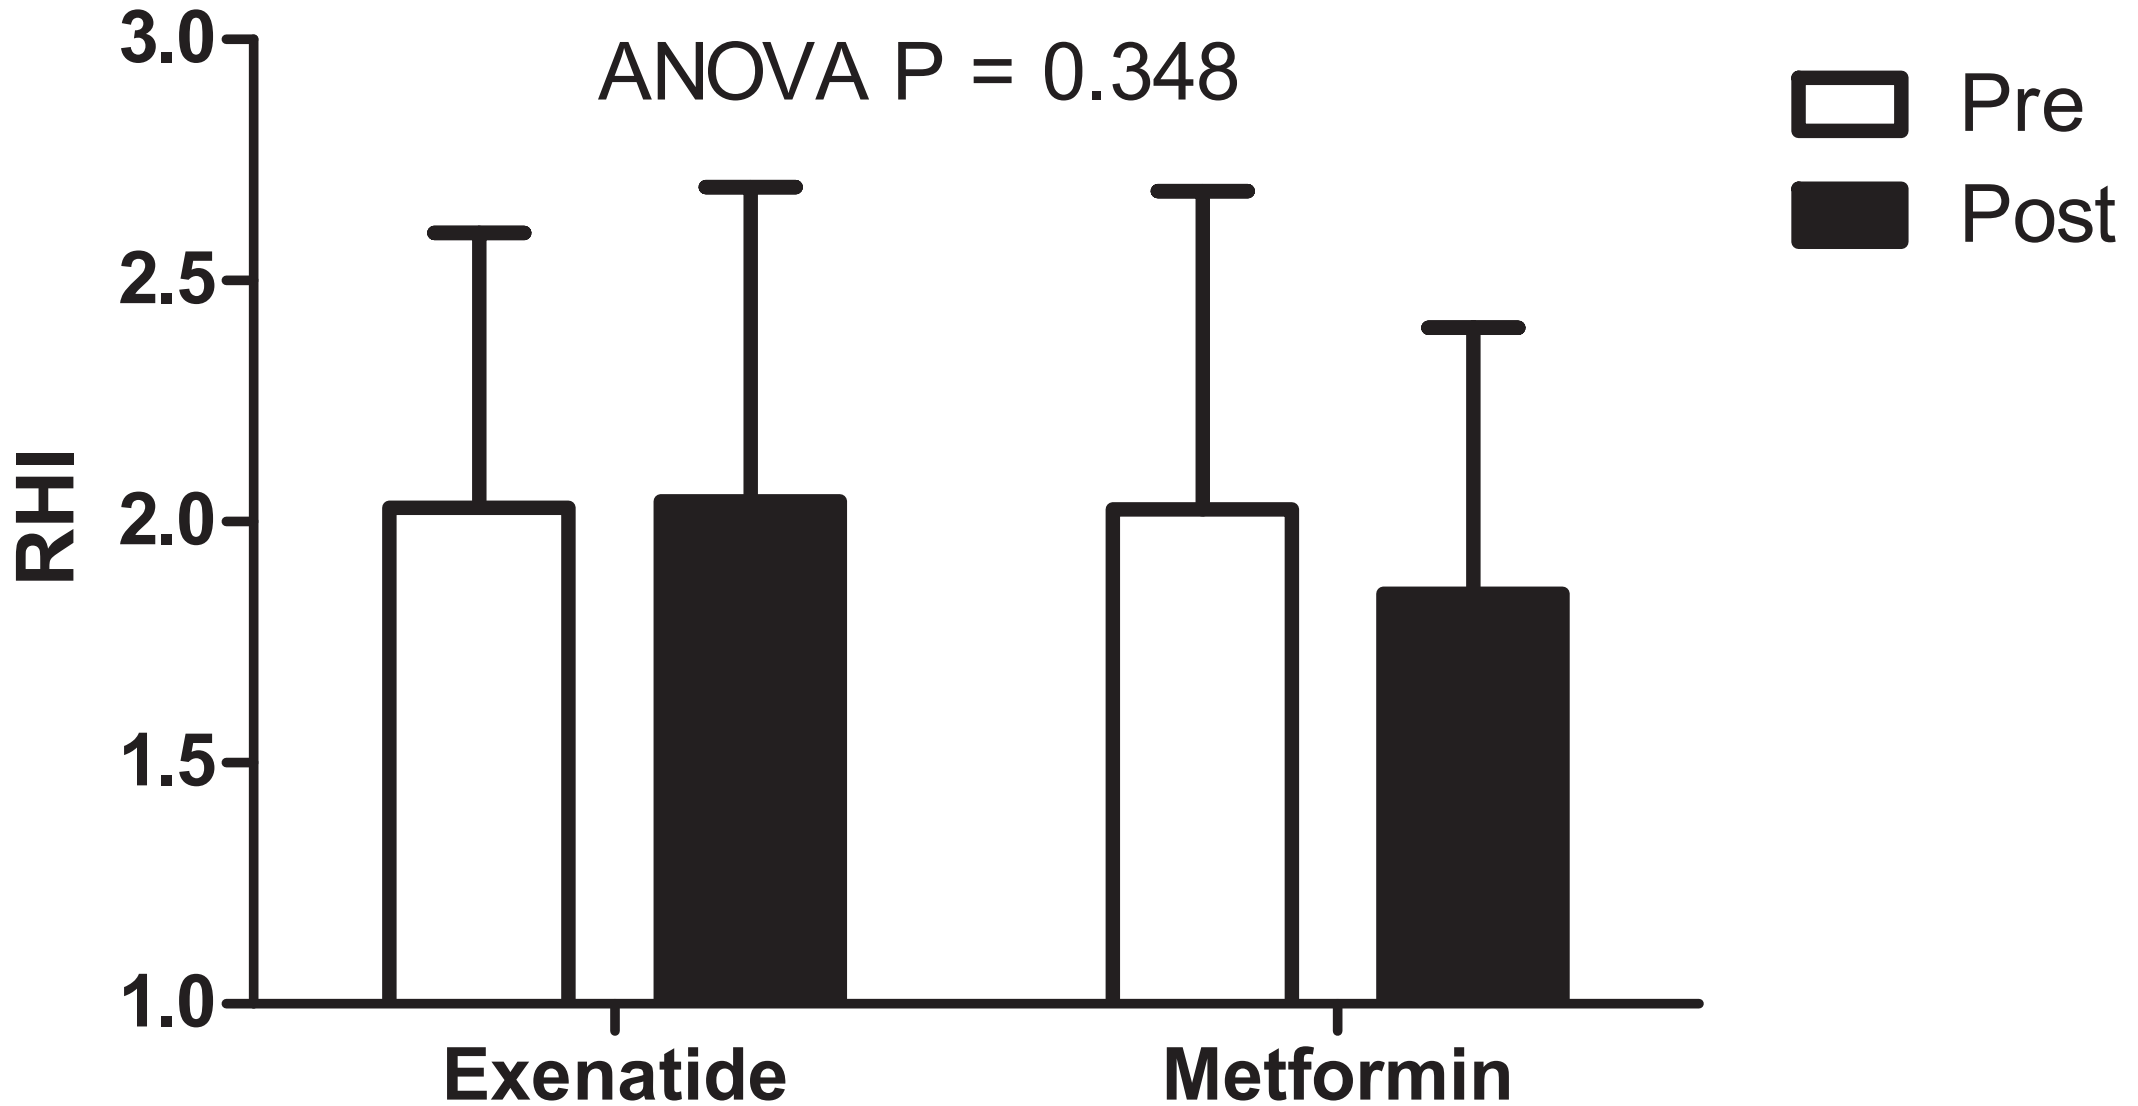

Supplement: MOESM1 [file 9538638]
